# Supplementary material
Source: PubMed Central journal article supplement (PMC151371)

**A**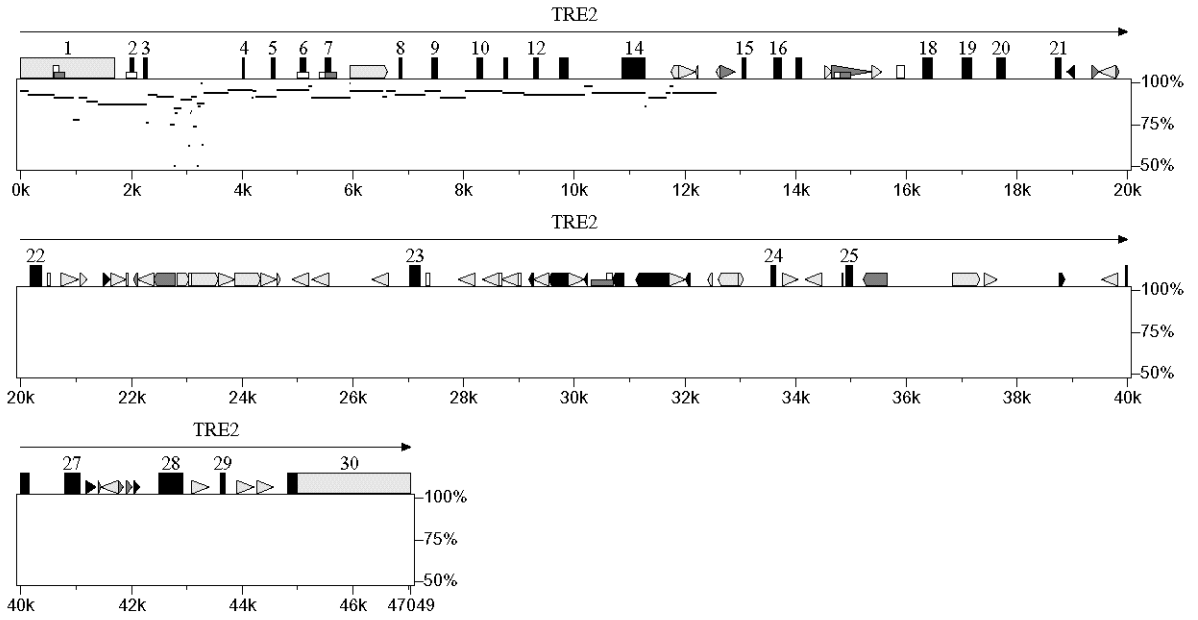**B**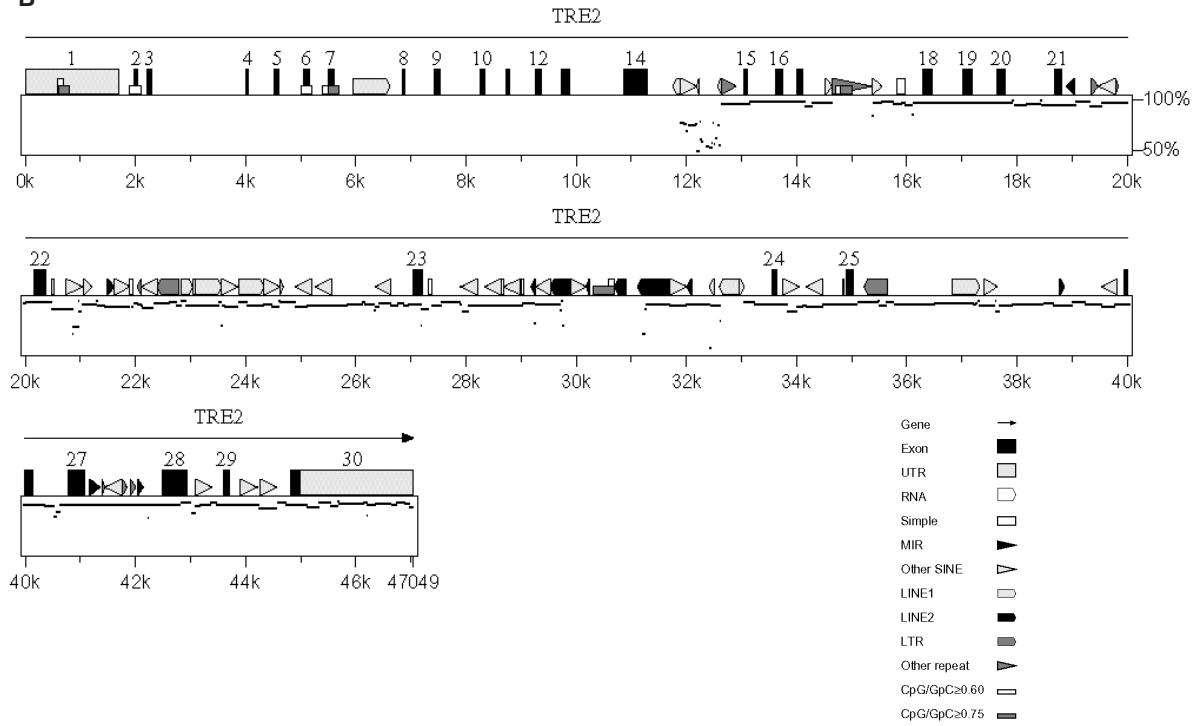

Supplement: pnas_0437015100_2.pdf [file pnas_0437015100_2.pdf]
